# Supplementary material for: Review of Mindfulness-Related Interventions to Modify Eating Behaviors in Adolescents
Source: MDPI journal article supplement (doi:10.3390/nu11122917), 2019-12-02
Supplement: s1 [file s1]

## Supplementary material:

### Table S1:search strategies

Summary

Boolean:

Mindfulness

AND (Eating OR Eating disorders)

AND (Adolescents OR teenagers OR young adults)

Limits: English language publications and Human subjects

Databases: Medline, PsycINFO, Embase

Searches run in July 2019

### Search Key

|      |                                                                                                                                                                                                                                               |
|------|-----------------------------------------------------------------------------------------------------------------------------------------------------------------------------------------------------------------------------------------------|
| /    | At the end of a term a / indicates that the term is a subject heading, to be searched in the subject heading field                                                                                                                            |
| *    | At the end of a term a * indicates that the database should look for any ending: mindful, mindfulness, mindfully                                                                                                                              |
| .mp. | At the end of a term a .mp. indicates that the database should look for the term in the title, abstract, author assigned keywords, subject headings, and a few other fields                                                                   |
| exp  | At the beginning of a subject heading, an exp indicates that the database should look for this subject heading OR any subject heading below it in the hierarchy: eating behaviour or binge eating or food refusal or dietary restraint or ... |

### Ovid MEDLINE and Epub Ahead of Print, In-Process & Other Non-Indexed Citations <1946 to July 05, 2019>

- 1 Mindfulness/
- 2 mindful\*.mp.
- 3 1 or 2
- 4 Eating/
- 5 Feeding Behavior/
- 6 eating.mp.
- 7 4 or 5 or 6
- 8 3 and 7
- 9 limit 8 to "adolescent (13 to 18 years)"
- 10 Adolescent/
- 11 (adolescen\* or teen\* or "young adult\*").mp.
- 12 10 or 11
- 13 8 and 12
- 14 9 or 13
- 15 limit 14 to (english language and humans)

### Ovid PsycINFO <1806 to July Week 1 2019>

Search Strategy:

- 1 Mindfulness/
- 2 mindfulness-based interventions/
- 3 mindful\*.mp.
- 4 1 or 2 or 3

- 5 exp eating behavior/
- 6 eating.mp.
- 7 5 or 6
- 8 4 and 7
- 9 (adolescen\* or teen\* or "young adult\*").mp.
- 10 8 and 9
- 11 limit 8 to 200 adolescence <age 13 to 17 yrs>
- 12 10 or 11
- 13 limit 12 to english language

**Ovid Embase <1974 to 2019 July 05>**

Search Strategy:

- 1 Mindfulness/
- 2 mindful\*.mp.
- 3 1 or 2
- 4 eating/
- 5 feeding behavior/
- 6 eating habit/
- 7 eating.mp.
- 8 4 or 5 or 6 or 7
- 9 exp adolescent/
- 10 (adolescen\* or teen\* or "young adult\*").mp.
- 11 9 or 10
- 12 3 and 8 and 11
- 13 limit 12 to (human and english language)
